# Supplementary material
Source: PubMed Central journal article supplement (PMC4378252)
Supplement: supp_142.7.1254_DEV119735supp.pdf [file supp_142.7.1254_DEV119735supp.pdf]

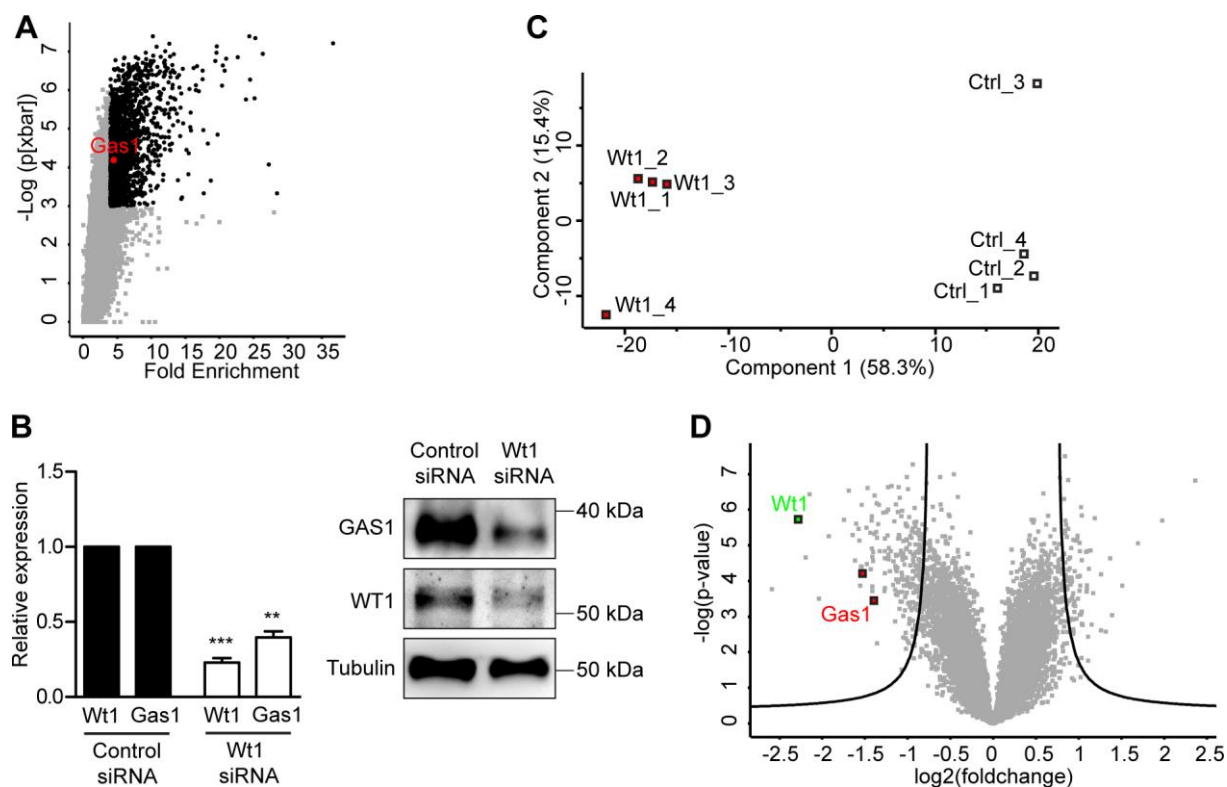

**Figure S1. Identification of *Gas1* as a candidate WT1 target gene from high throughput experiments.** **A** Volcano plot of previously published WT1 ChIP-on-chip data. Significantly enriched probes shown in black. *Gas1* probe is labeled in red. **B** Confirmation of siRNA-mediated *Wt1* knockdown and decreased *Gas1* expression in *Wt1*-knockdown LB-22 cells by qPCR and western blot. (\*\* p < 0.01, \*\*\* p < 0.001, error bars = s. e. m., n =3 ). **C** Principal component analysis of gene expression array data shown in **A**. **D** Volcano plot identifying significant differentially regulated genes between siRNA-mediated *Wt1* knockdown and control LB-22 cells. *Gas1* and *Wt1* probes are highlighted. Black lines indicate an FDR threshold of 0.0001.

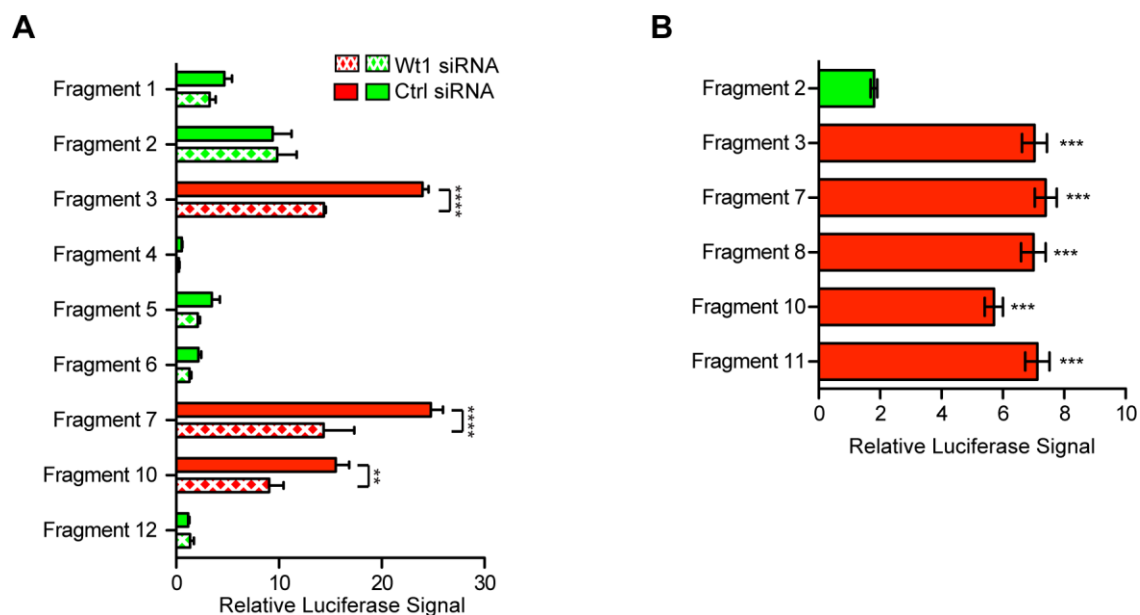

**Figure S2. An endogenous 200 bp *Gas1* promoter fragment is WT1 responsive and sufficient to drive reporter transcription in the absence of a minimal promoter. A** Bar graph representing dual luciferase reporter assay results in LB-22 cells normalized to empty vector. Location of fragments is provided in Fig. 1A. Fragments containing the WT1 binding site show reduced reporter signals upon transfection of WT1 siRNA. (\*\*  $p < 0.01$ , \*\*\*\*  $p < 0.0001$ ,  $n = 3$ , error bars = s. e. m.). **B** Dual luciferase reporter assays using a reporter vector missing a minimal promoter. The WT1-responsive element is sufficient to endogenously drive reporter activation. (\*\*\*)  $p < 0.001$ ,  $n = 3$ , error bars = s. e. m.)

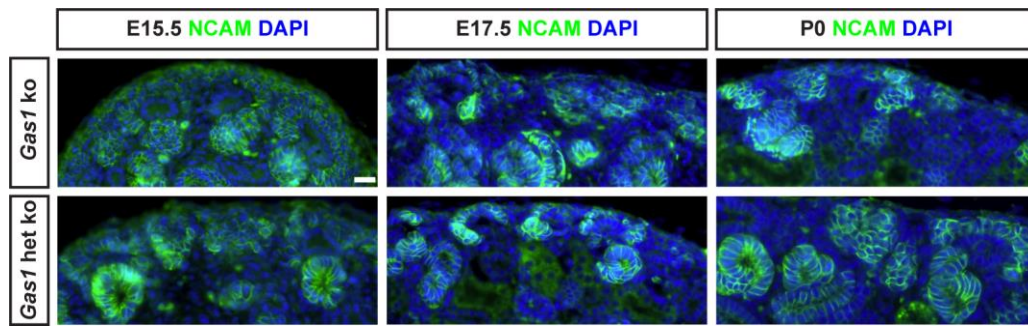

**Figure S3. *Gas1* knockout kidneys show reduced nephrogenesis in later stages of kidney development.** Immunofluorescence stainings for NCAM showing nephron progenitor cells and primordial nephrons from the RV to S-shaped body stage at various stages in kidney development. Normal induction of nephrons is present in *Gas1* knockout kidneys at E15.5. At later stages, reduced numbers of progenitors and induced nephrons become evident. Scale bar: 10  $\mu$ m.

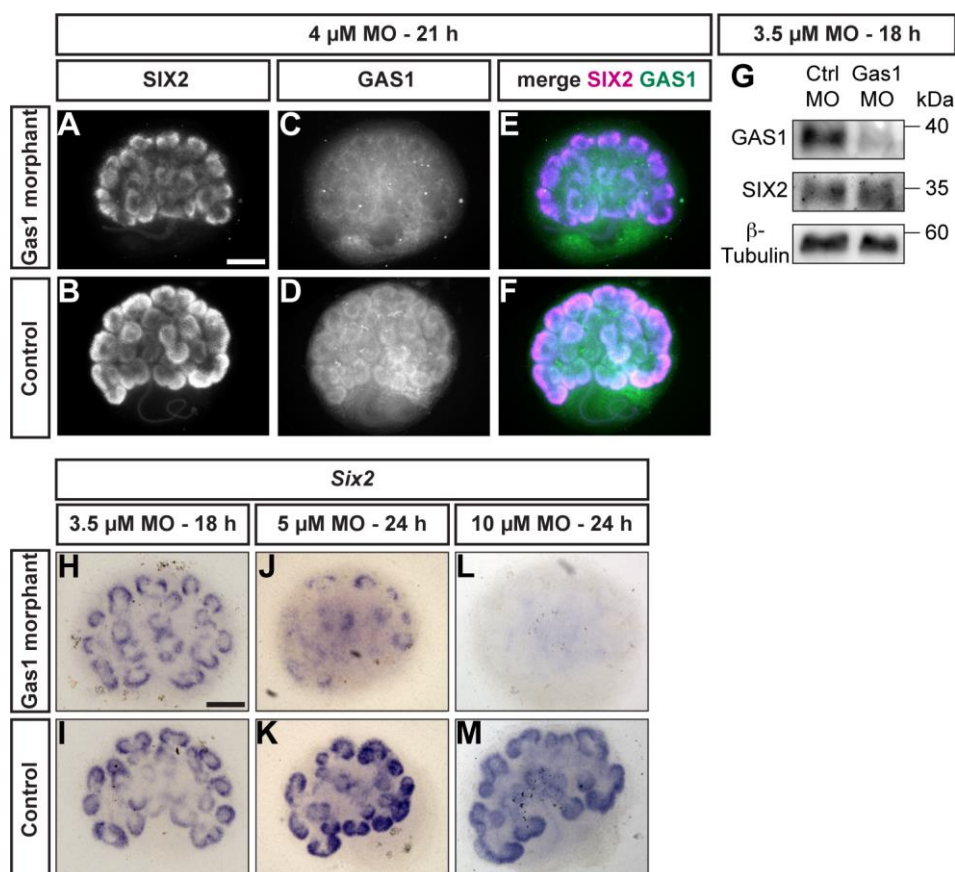

**Figure S4. Knock-down of GAS1 in kidney organ cultures confirms a role of Gas1 in maintaining nephron progenitor cells.** A – F Whole-mount immunofluorescence staining of kidney organ cultures exposed to Gas1 MO at indicated concentrations or control MO. GAS1 expression is reduced beyond the depletion of SIX2<sup>+</sup> NPC in Gas1 morphant cultures indicating an effective knockdown. Scale bar: 100 μm **G** Western blot of pooled whole cell lysates of explants cultured in a mild knockdown condition (2.1 μM Gas1 MO1, 1.4 μM Gas1 MO2, 18 hours) or in a control condition (3.5 μM Control MO, 18 hours). Efficient knockdown of GAS1 is evident, while SIX2 signals are preserved. **H – M** Whole-mount in situ hybridization of Gas1 morphant and control organ cultures for *Six2* when cultured in the presence of increasing concentrations of Gas1 MO. A reciprocal relationship between the degree of Gas1 knockdown and preservation of the nephron progenitor pool is evident, indicating a role for Gas1 in maintaining nephron progenitor cells in this *ex vivo* model. Scale bar: 100 μm.

**Table S1.** Primer, siRNA and morpholino sequences.

| Primer name               |   | Sequence (5' to 3')               |  |
|---------------------------|---|-----------------------------------|--|
| <b>Genotyping primers</b> |   |                                   |  |
| Six2-Cre                  | f | ATG TCC AAT TTA CTG ACC GT        |  |
|                           | r | CGC CGC ATA ACC AGT GAA AC        |  |
| Wt1 shRNA                 | f | CGA AGT TAT CTA GAG TCG AC        |  |
|                           | r | AAA CAA GGC TTT TCT CCA AGG       |  |
| Gas1 mutant               | f | ACT ACG CGT ACT GTG AGC CAG AG    |  |
|                           | r | AGT GAC CAG CGA ATA CCT GTT CC    |  |
| Gas1 wild type            | f | TAC TGC GGC AAG CTT TTC AAC GG    |  |
|                           | r | AGC GCG CTG CTC GTC GTC ATA TTC   |  |
| <b>ChIP qPCR</b>          |   |                                   |  |
| Gapdhs                    | f | CAG GAG CCC AGG GAA GAT ACA AAT A |  |
|                           | r | ACG CAT ACA CAT ATA CAA CCA GTC A |  |
| Jmjd1a                    | f | GCA GCT CCA TTC TTC CAT TT        |  |
|                           | r | GCT CAT GAT CCT GGG TCT C         |  |
| Gas1 Amplicon 1           | f | GAG CTG GAT AAG CGC CGA GAT G     |  |
|                           | r | GCC AGT ACG CCG AGG CTT GT        |  |
| Gas1 Amplicon 2           | f | GTG CGG AGC GGA GAC GAG G         |  |
|                           | r | GAT GAG GAC GCC CAT GCC AGA A     |  |
| Gas1 Amplicon 3           | f | CCG GGG GTG CAT GGT GCT           |  |
|                           | r | GGG TAG AGG GGG AGG GGA C         |  |
| Gas1 Amplicon 4           | f | CCG CGA GGC TTT AAA TAC AA        |  |
|                           | r | CGG AGA GTG GAG AAA GGA GA        |  |
| Gas1 Amplicon 5           | f | CAG CGG GCA GGG CTT AGG G         |  |
|                           | r | ACA AAA AGG GGG CGG AGG AAG G     |  |
| Gas1 Amplicon 6           | f | CCA GCT TTC AGT CCC CCT TTC C     |  |

|                                         |   |                                              |  |
|-----------------------------------------|---|----------------------------------------------|--|
|                                         | r | TGC TAA GAT TTG TCA TTG CCG TTC GT           |  |
| Gas1 Amplicon 7                         | f | AAA GCA AAA GCC ACC AGC AGA G                |  |
|                                         | r | AGG GGA GAG GAA GGA GCC AGT T                |  |
| <b>RT-qPCR</b>                          |   |                                              |  |
| Wt1                                     | f | GAG AGC CAG CCT ACC ATC C                    |  |
|                                         | r | GGG TCC TCG TGT TTG AAG GAA                  |  |
| Gas1                                    | f | CGA ATC GGT CAA AGA GAA CA                   |  |
|                                         | r | GCT CGT CGT CAT ATT CTT CG                   |  |
| Gapdh                                   | f | CAA TGA AGG GGT CGT TGA T                    |  |
|                                         | r | GGT GAA GGT CGG TGT GAA                      |  |
| Wnt11                                   | f | GCT GGC ACT GTC CAA GAC TC                   |  |
|                                         | r | CTC CCG TGT ACC TCT CTC CA                   |  |
| Etv5                                    | f | TCA GTC TGA TAA CTT GGT GCT TC               |  |
|                                         | r | GGC TTC CTA TCG TAG GCA CAA                  |  |
| Cxcr4                                   | f | TCC AAC AAG GAA CCC TGC TTC                  |  |
|                                         | r | TTG CCG ACT ATG CCA GTC AAG                  |  |
| Crlf1                                   | f | CTC CCT GCA AGC TAC CTG C                    |  |
|                                         | r | AGG GTG GAG GTG TTA AGG AGG                  |  |
| <b>Cloning Gas1 promoter constructs</b> |   |                                              |  |
| Fragment 1                              | f | CGG CCA GGA CGC TTG GT                       |  |
|                                         | r | CAC CGC TCC CGG CCC ACT TTT GTA TTT A        |  |
| Fragment 2                              | f | CGG AGC CCG GCT GCG GAC TAG C                |  |
|                                         | r | CAC CAG GGC GCC GGA GAG TGG AGA AAG G        |  |
| Fragment 3                              | f | TTG CTC GGC CCC CTT CCC CGG CTT              |  |
|                                         | r | CAC CGC CCT GCC CGC TGG CTC TGT GCG          |  |
| Fragment 4                              | f | TTA GGG CCA GCT GCC TGC                      |  |
|                                         | r | CAC CGA GGA ACT GAA ACG TGC AGT TTA<br>AAG C |  |
| Fragment 5                              | f | GCT GTG TTT AAA GCA AAA GCC ACC AG           |  |

|                                         |   |                                                                                                             |  |
|-----------------------------------------|---|-------------------------------------------------------------------------------------------------------------|--|
|                                         | r | CAC CCA CAG CTC AGT CTG CCT CTC TCA TCC                                                                     |  |
| Fragment 3<br>mutagenesis motif 1       | f | TGG AGT GGG GCT GCA GAG TTG GAT AGG<br>GCG GTG G                                                            |  |
|                                         | r | CCA CCG CCC TAT CCA ACT CTG CAG CCC CAC<br>TCC A                                                            |  |
| Fragment 3<br>mutagenesis motif 2       | f | GAC ACA GGC CCA GCT CCT TAC AAT CTT CAG<br>GAG GCT GG                                                       |  |
|                                         | r | CCA GCC TCC TGA AGA TTG TAA GGA GCT<br>GGG CCT GTG TC                                                       |  |
| <b>siRNAs &amp; shRNAs</b>              |   |                                                                                                             |  |
| Gas1 siRNA 1                            | f | CCG CUG AUC UAU ACU GCC AGC UCU A                                                                           |  |
|                                         | r | UAG AGC UGG CAG UAU AGA UCA GCC G                                                                           |  |
| Gas1 siRNA 2                            | f | UAG AUC AGC CGG UUA UCU CUG CAG C                                                                           |  |
|                                         | r | GCU GCA GAG AUA ACC GGC UGA UCU A                                                                           |  |
| Gas1 Ctrl siRNA                         | f | CGG CUA GAU AUC GUC CGA CUU CCU A                                                                           |  |
|                                         | r | UAG GAA GUC GGA CGA UAU CUA GCC G                                                                           |  |
| WT1 siRNA                               | f | UUC CAG GUC AUG CAU UCA AGC UGG G                                                                           |  |
|                                         | r | CCC AGC UUG AAU GCA UGA CCU GGA A                                                                           |  |
| WT1 Ctrl siRNA                          | f | UUC UCC GAU GAC GUA CUU ACG AGG G                                                                           |  |
|                                         | r | CCC UCG UAA GUA CGU CAU CGG AGA A                                                                           |  |
| WT1 shRNA                               | f | GCC CAG CTT GAA TGC ATG ACC TGG AAC<br>AAG AGA TTC CAG GTC ATG CAT TCA AGC<br>TGG GTT TTT TCC ATG GGC       |  |
|                                         | r | GGC CGC CCA TGG AAA AAA CCC AGC TTG<br>AAT GCA TGA CCT GGA ATC TCT TGT TCC AGG<br>TCA TGC ATT CAA GCT GGG C |  |
| <b>Vivo-Morpholino oligonucleotides</b> |   |                                                                                                             |  |
| WT1 MO                                  |   | CAG GTC CCG CAC GTC GGA ACC CAT G                                                                           |  |
| WT1 mismatch MO                         |   | CAG cTC CgG CAC cTC GcA ACC gAT G                                                                           |  |
| GAS1 MO 1                               |   | TCC CTG AGA AGC GCG GCG ACG CA                                                                              |  |
| GAS1 MO 2                               |   | GCG TCC TCA TCC ATC CAT GCC GG                                                                              |  |
| Control MO                              |   | CCT CTT ACC TCA GTT ACA ATT TAT A                                                                           |  |
